# Supplementary material for: The intrathecal morphine analgesia for full endoscopic lumbar discectomy: a prospective dose-finding study
Source: Research Square preprint supplement (doi:10.21203/rs.3.rs-6307758/v1), 2025-04-21
Supplement: Supplementary file 1 [file 371b4c99ff36711c14a97d50.docx]

**Supplementary table 1. The pain intensity and ODI index comparison**

|  | High-dose Group (N=16) | Low-dose Group (N=14) | p value |
| --- | --- | --- | --- |
| Intra-operation (VAS) | 0(0, 0) | 0(0, 0) | 0.27 |
| 1 h postoperatively (VAS) | 0(0, 0) | 0(0, 0) | 0.12 |
| 12 h postoperatively (VAS) | 0(0, 0) | 0(0, 0) | 0.23 |
| 24 h postoperatively (VAS) | 0(0, 0) | 0(0, 0) | 0.48 |
| 72 h postoperatively (VAS) | 0(0, 0.5) | 0(0, 0.75) | 0.96 |
| 1 mon postoperatively (VAS) | 0(0, 1) | 0(0, 1) | 0.65 |
| 1 mon postoperatively (ODI, %) | 11.81±10.51 | 10.32±6.84 | 0.66 |

**Note:** VAS = visual analogue scale (0-10), ODI = Oswestry disability index

**Supplementary Appendix 2**
**Biased Coin Up-Down Method Formula for Dose Adjustment**

The coin up-down method, used in this study for dose adjustment with a 1/9 probability of dose reduction, was implemented in Excel using the following formula:

=LOOKUP(RAND()*90,{0,10},{"down","stay"})

**Explanation:**

- **RAND()**: Generates a random number between 0 and 1.
- **RAND()*90**: Scales the random number to a range between 0 and 90.
- **{0,10}**: Defines the thresholds for categorizing the outcomes.
  - A value between 0 and 10 corresponds to "down" (indicating dose reduction).
  - A value above 10 corresponds to "stay" (indicating no change in dose).
- **{"down","stay"}**: Maps the thresholds to the respective outcomes.
- The probability of a dose reduction ("down") is approximately 1/9 (10 out of 90 possibilities).
